# Supplementary material for: Macrophage-derived interleukin-6 is necessary and sufficient for choroidal angiogenesis
Source: PubMed Central journal article supplement (PMC8433398; doi:10.1038/s41598-021-97522-x), 2021-09-10

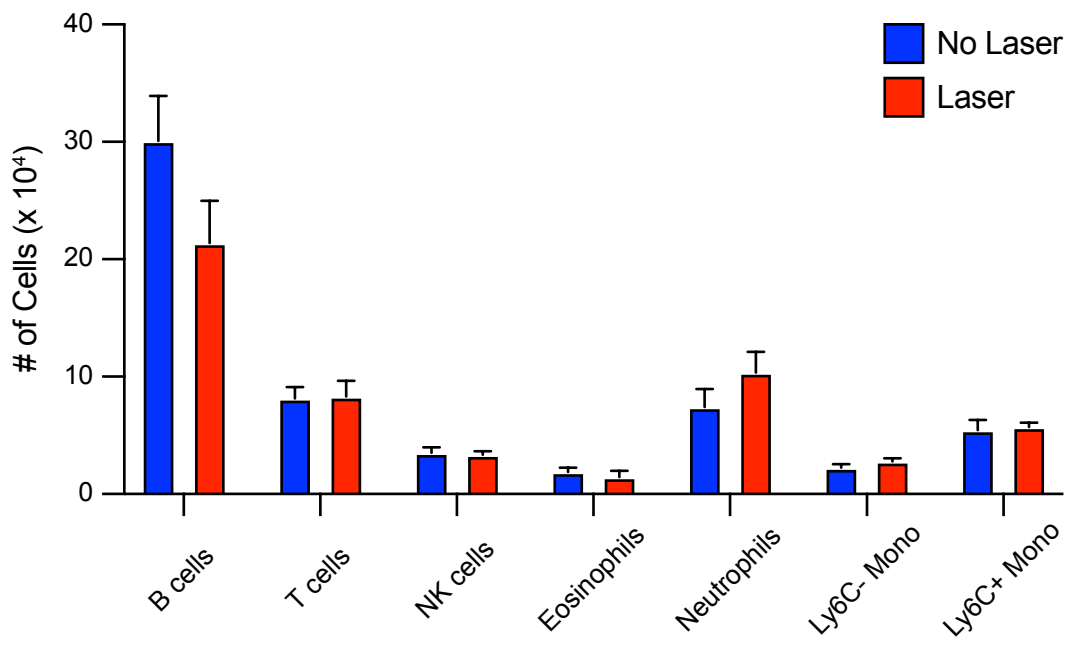

Supplement: 41598_2021_97522_MOESM3_ESM.pdf [file 41598_2021_97522_MOESM3_ESM.pdf]
